# Supplementary material for: Epigenetic landscape in the kick-and-kill therapeutic vaccine BCN02 clinical trial is associated with antiretroviral treatment interruption (ATI) outcome
Source: PubMed Central journal article supplement (PMC8938861; doi:10.1016/j.ebiom.2022.103956), 2022-03-21
Supplement: mmc1.pdf [file mmc1.pdf]

Figure S1

**a**

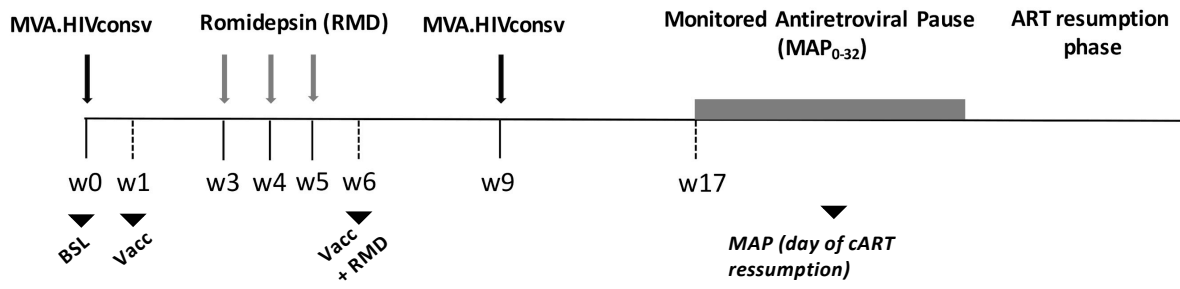

**b**

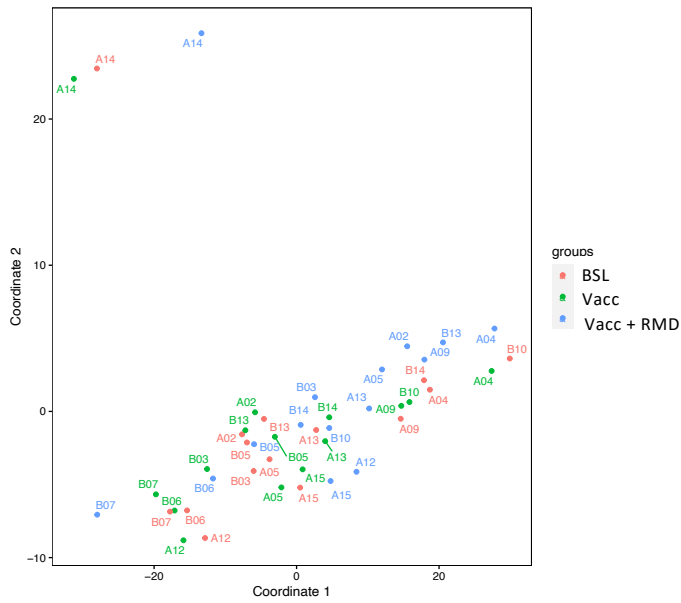

**c**

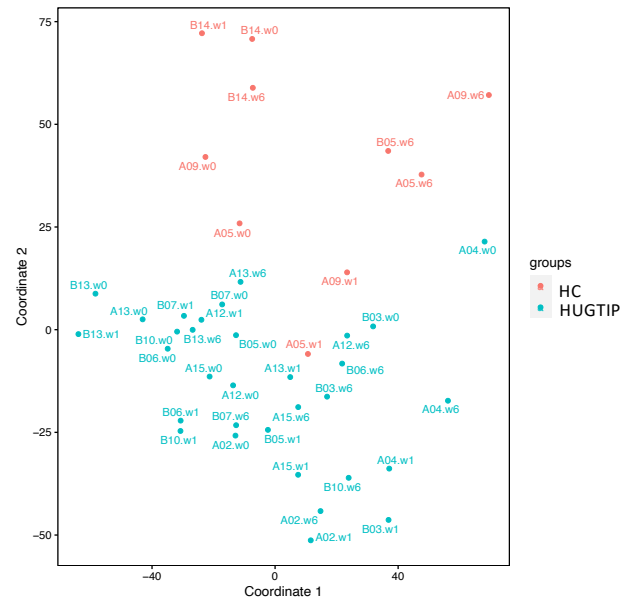

Figure S2

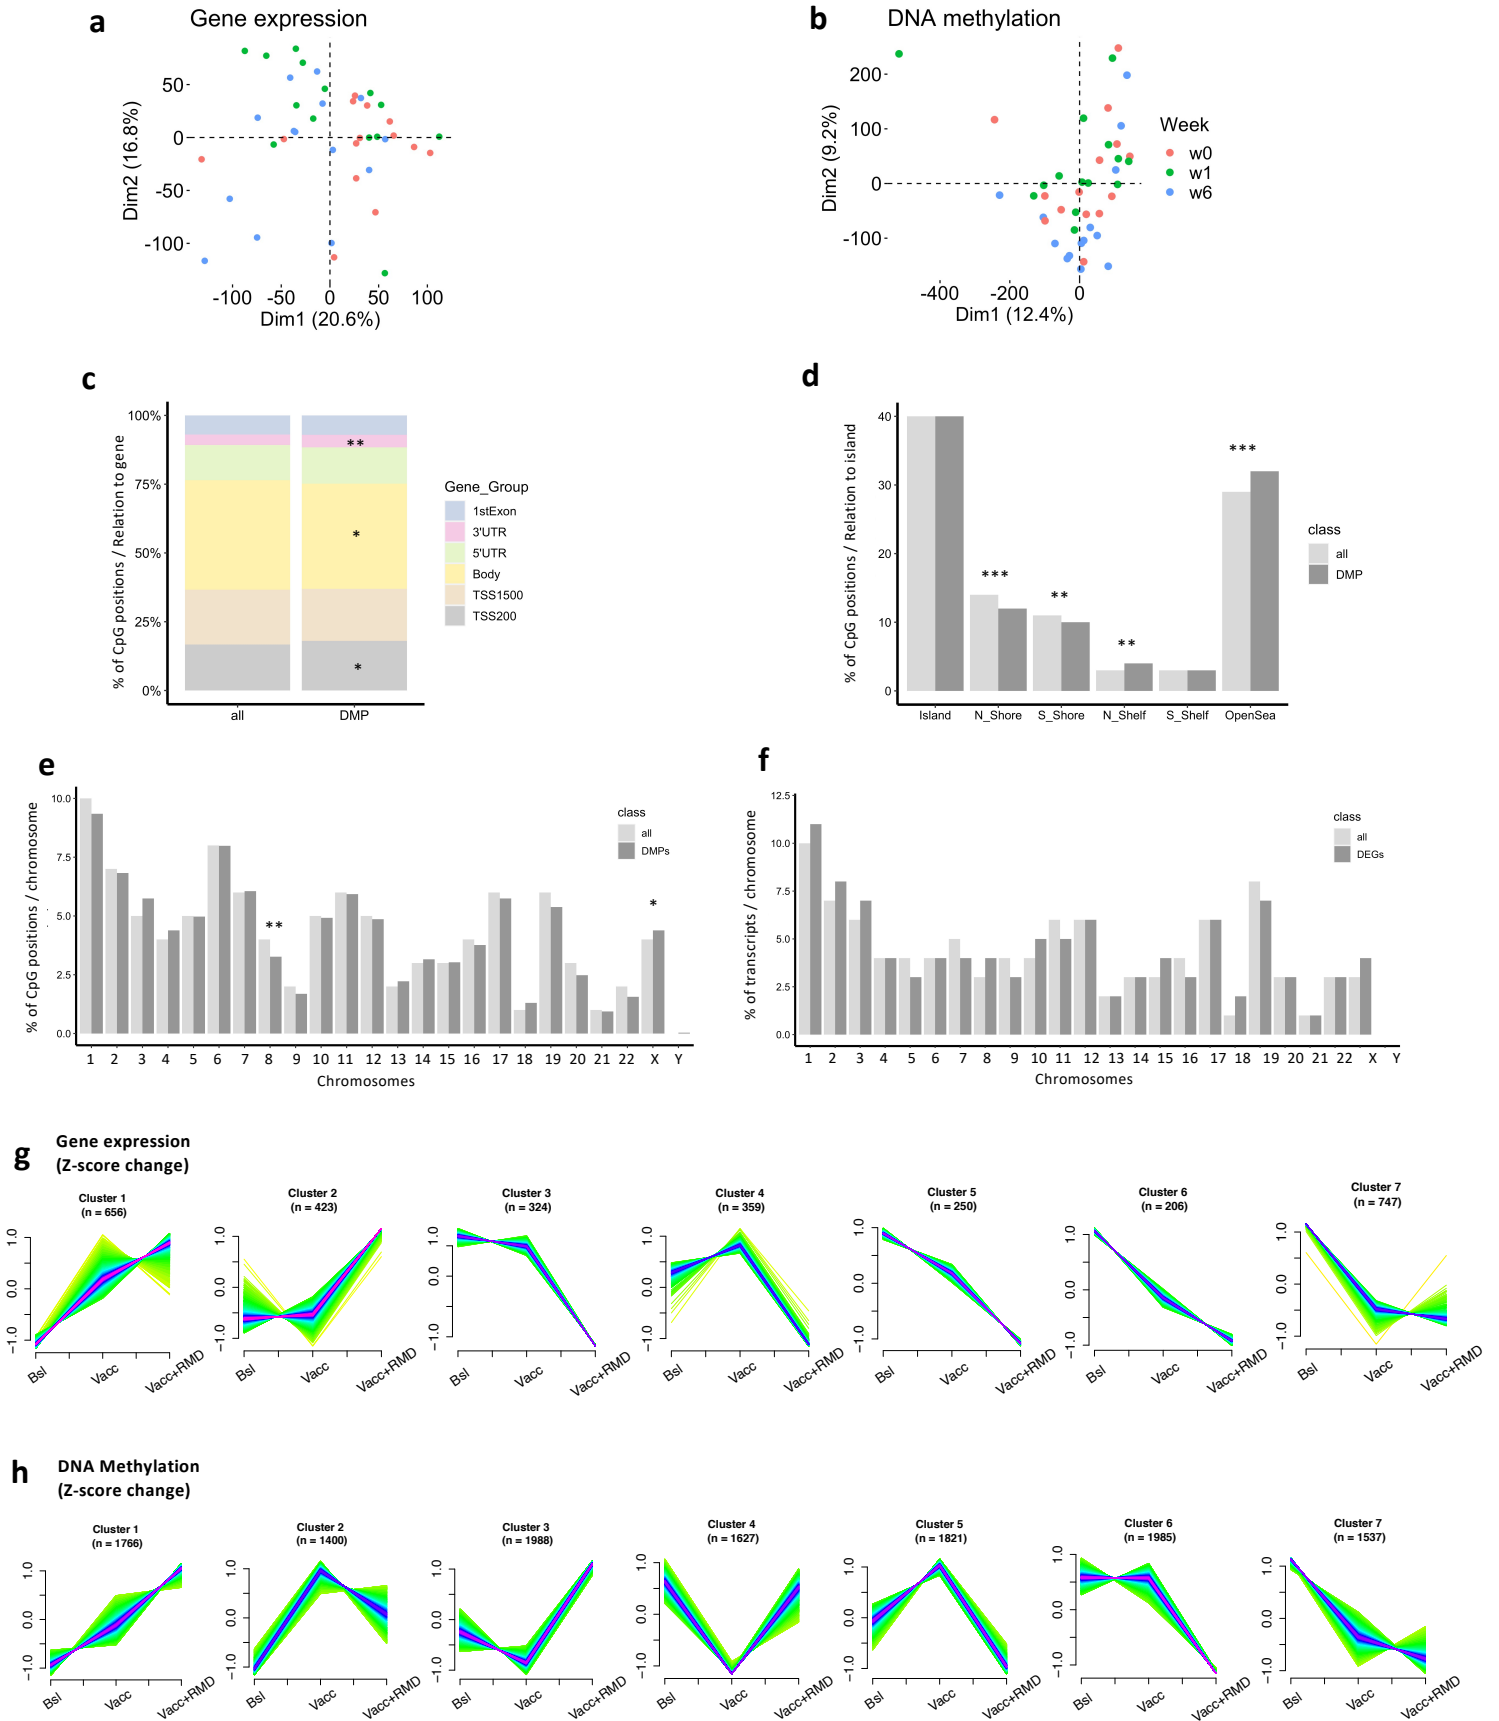

Figure S3

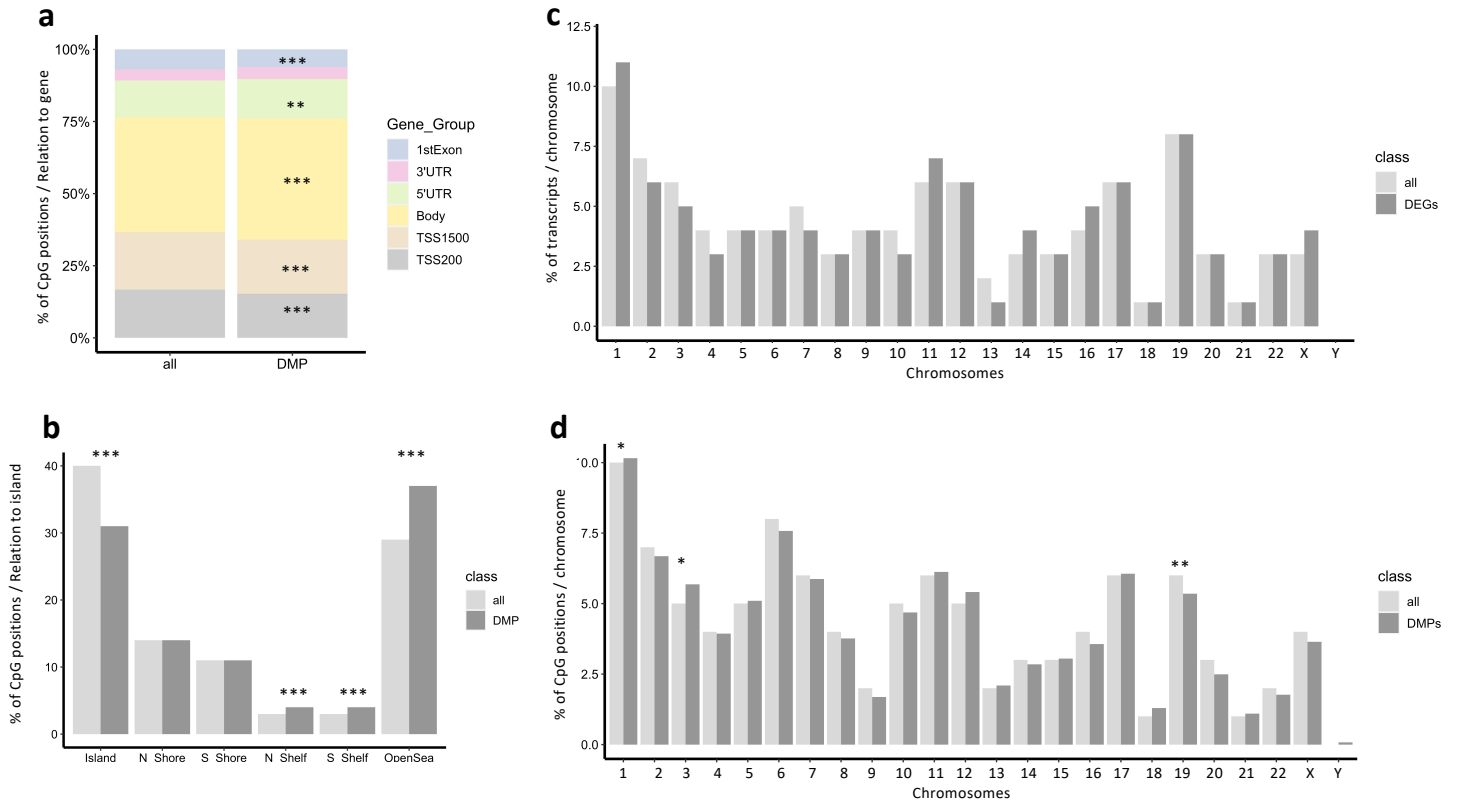

Figure S4

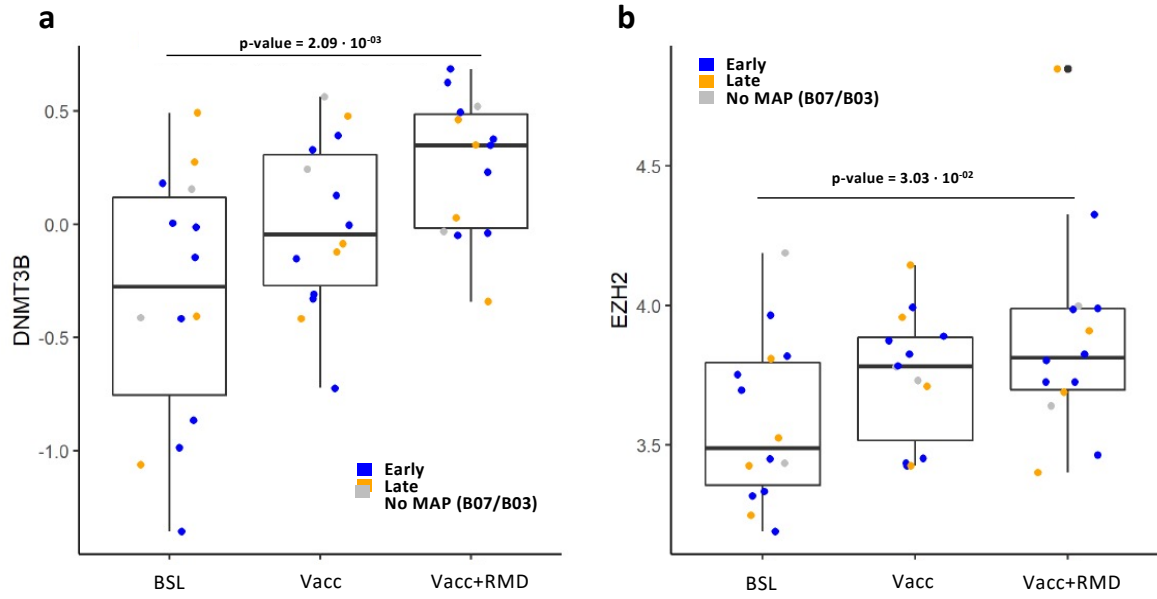



Figure S6

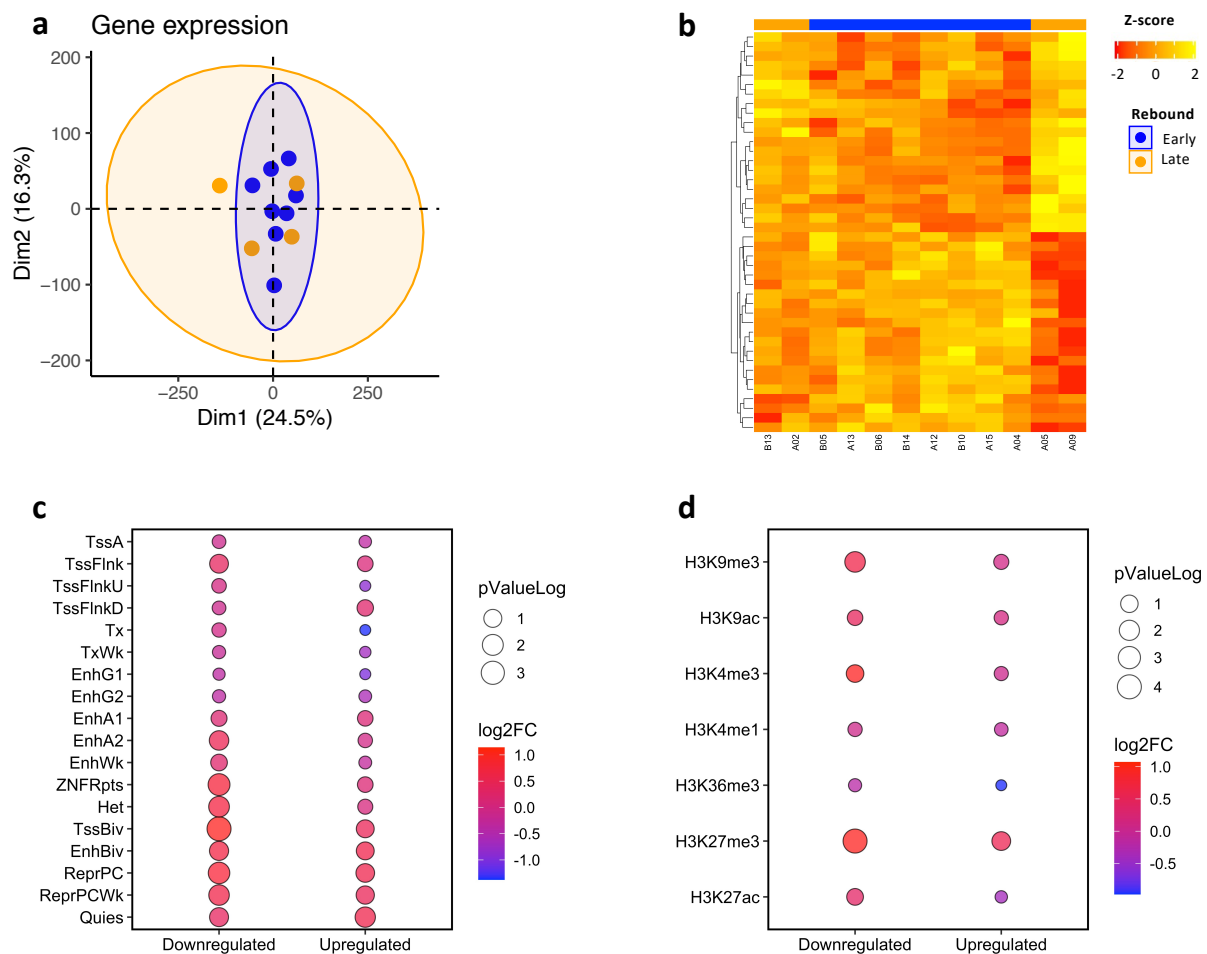

Figure S7

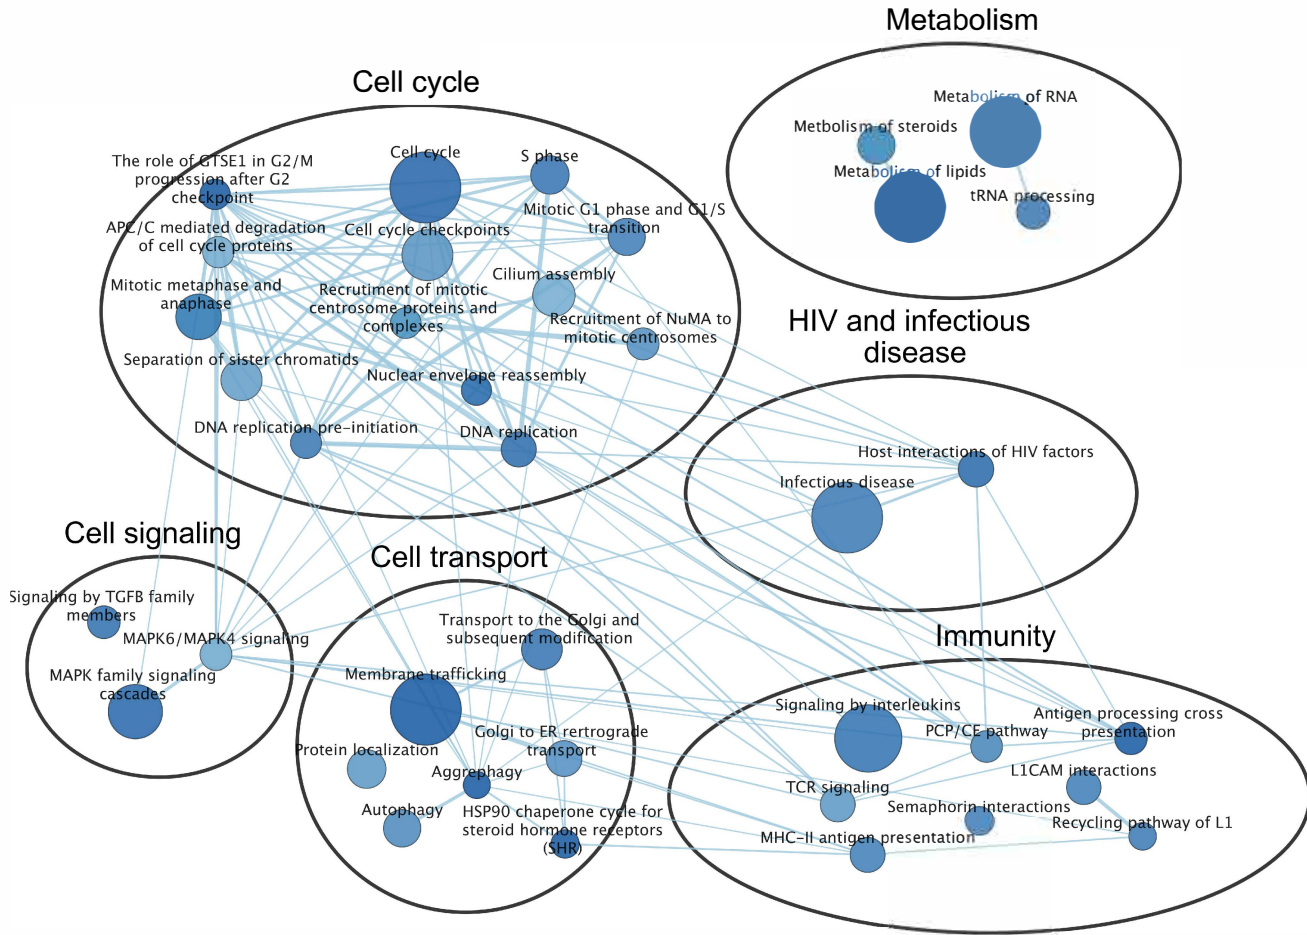

Figure S8

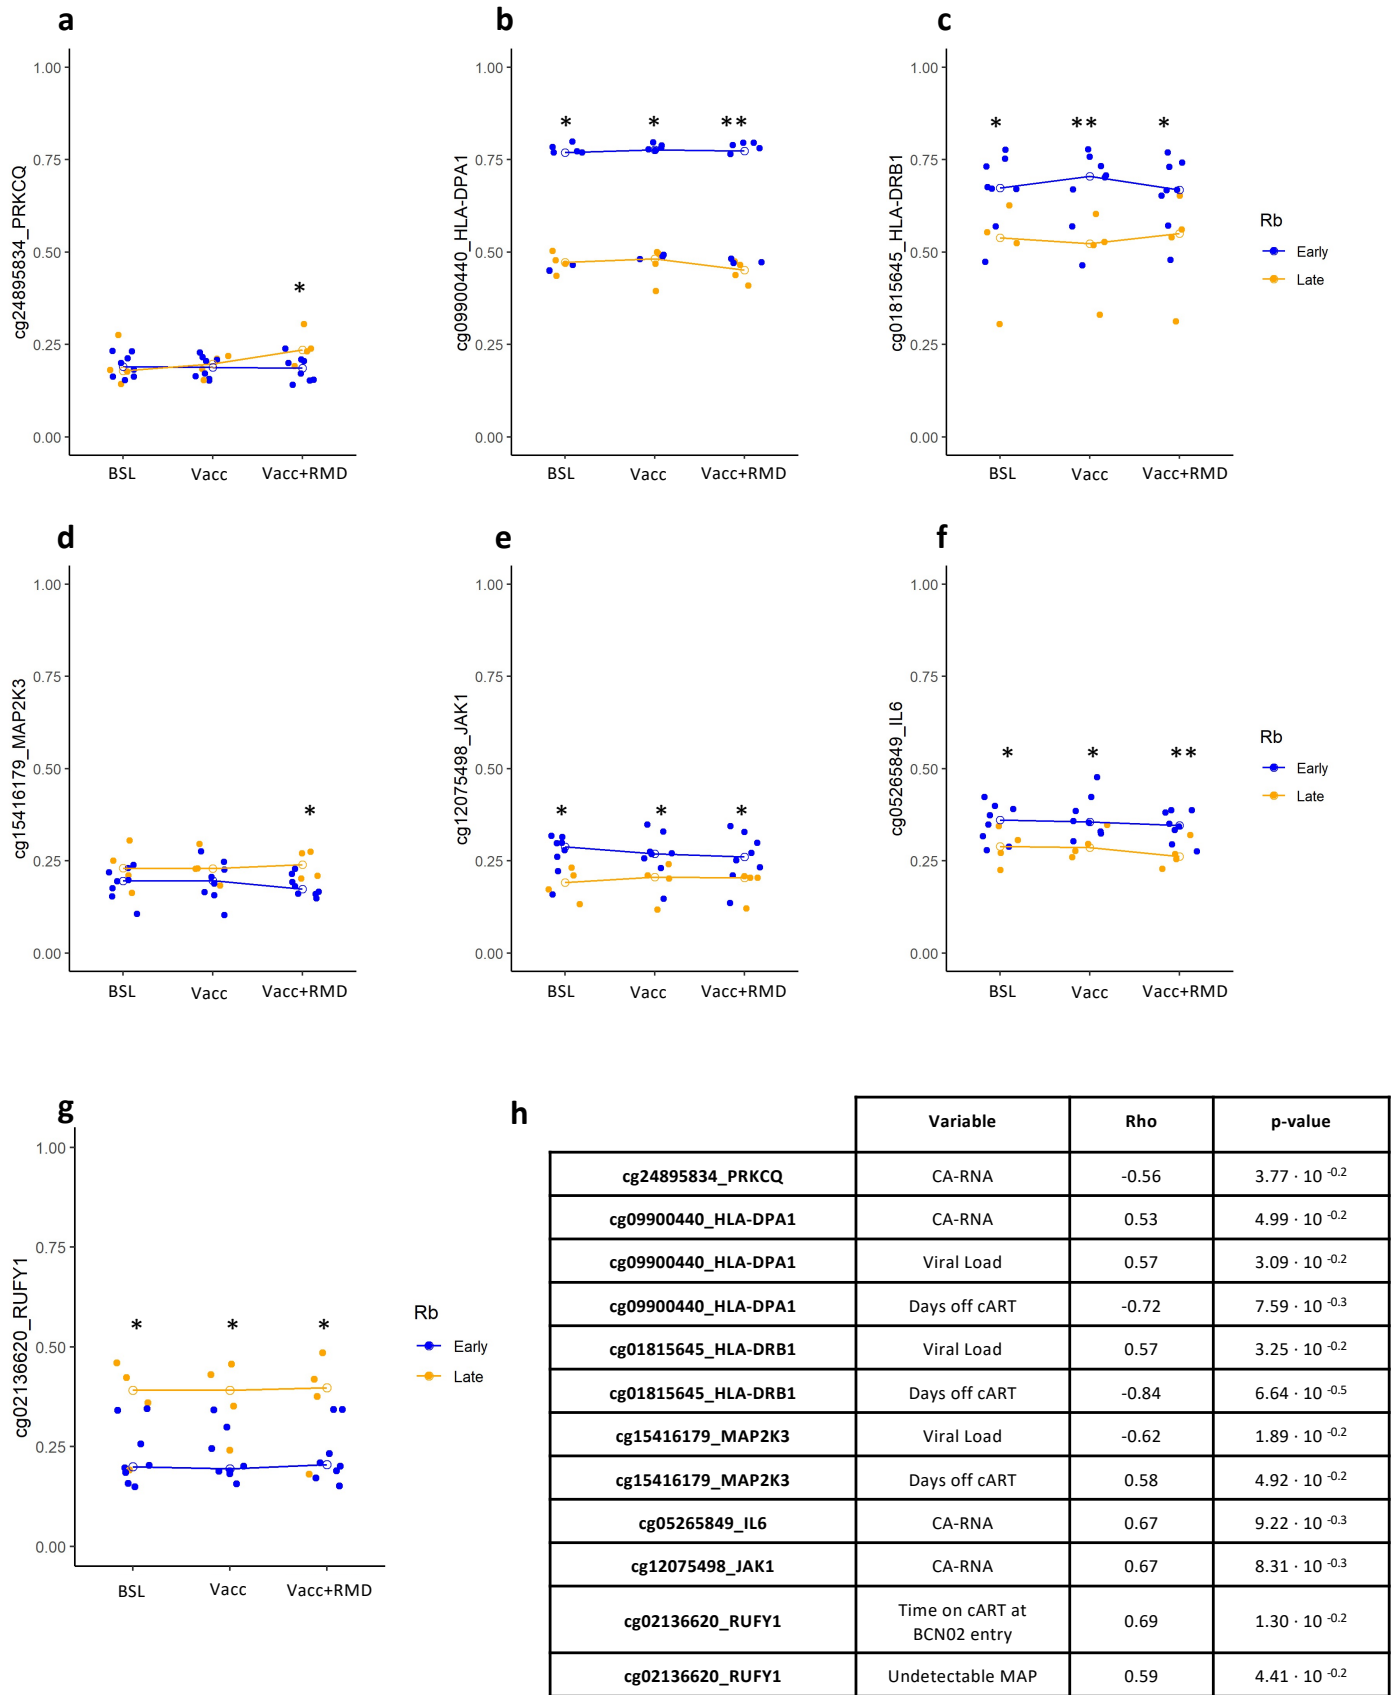



Figure S9

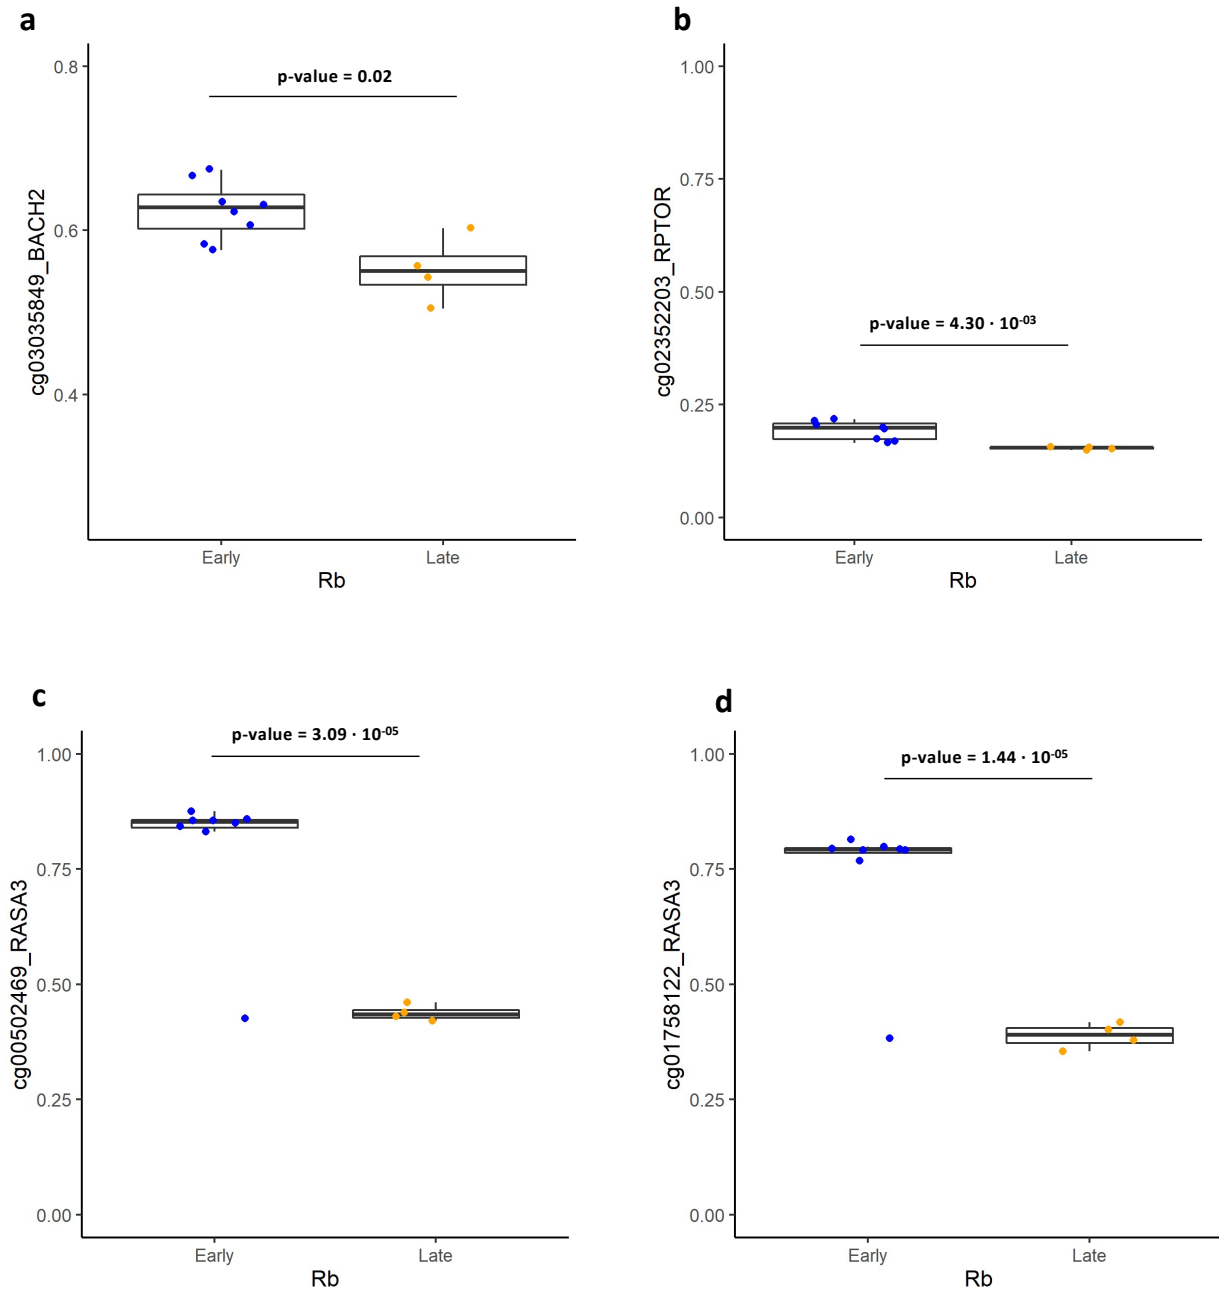

**e**

|                  | Variable | Rho  | p-value |
|------------------|----------|------|---------|
| cg03035849_BACH2 | CA-RNA   | 0.59 | 0.03    |
| cg02352203_RPTOR | CA-RNA   | 0.59 | 0.026   |
| cg00502469_RASA3 | Proviral | 0.54 | 0.048   |
| cg00502469_RASA3 | CA-RNA   | 0.72 | 0.003   |
| cg01758122_RASA3 | CA-RNA   | 0.70 | 0.005   |
